# Supplementary material for: Hierarchical NiFeV hydroxide nanotubes: synthesis, topotactic transformation and electrocatalysis towards the oxygen evolution reaction
Source: Royal Society of Chemistry journal article supplement (doi:10.1039/d2dt01235a), 2022-01-01
Supplement: d2dt01235a1.pdf [file d2dt01235a1.pdf]

# Hierarchical NiFeV Hydroxide Nanotubes: Synthesis, Topotactic Transformation and Electrocatalysis towards Oxygen Evolution Reaction

Qingying Li,<sup>a</sup> Xiaohe Liu,<sup>\*a,b</sup> Zhicheng Zheng,<sup>a</sup> Gen Chen,<sup>a</sup> Renzhi Ma,<sup>c</sup> Hao Wan<sup>\*b</sup>

<sup>a</sup> State Key Laboratory of Powder Metallurgy and School of Materials Science and Engineering, Central South University, Changsha, Hunan 410083, P.R. China.

<sup>b</sup> School of Chemical Engineering, Zhengzhou University, Zhengzhou 450001, P.R. China.

<sup>c</sup> World Premier International Center for Materials Nanoarchitectonics (WPI-MANA), National Institute for Materials Science (NIMS), Namiki 1-1, Tsukuba, Ibaraki 305-0044, Japan.

## Corresponding Author

\*E-mail: liuxh@csu.edu.cn (Xiaohe Liu).

\*E-mail: wanhao@zzu.edu.cn (Hao Wan).

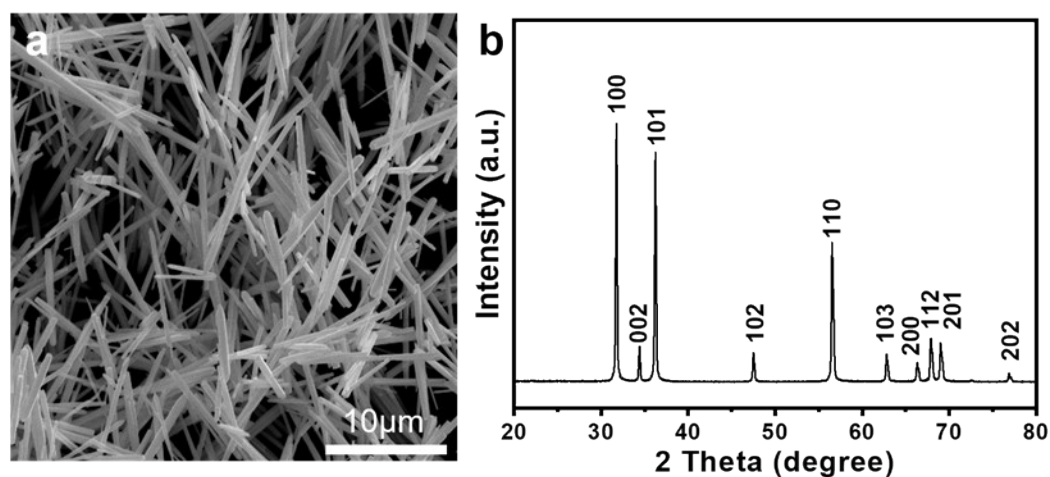

**Fig. S1.** (a) SEM image and (b) XRD pattern of ZnO nanorods.

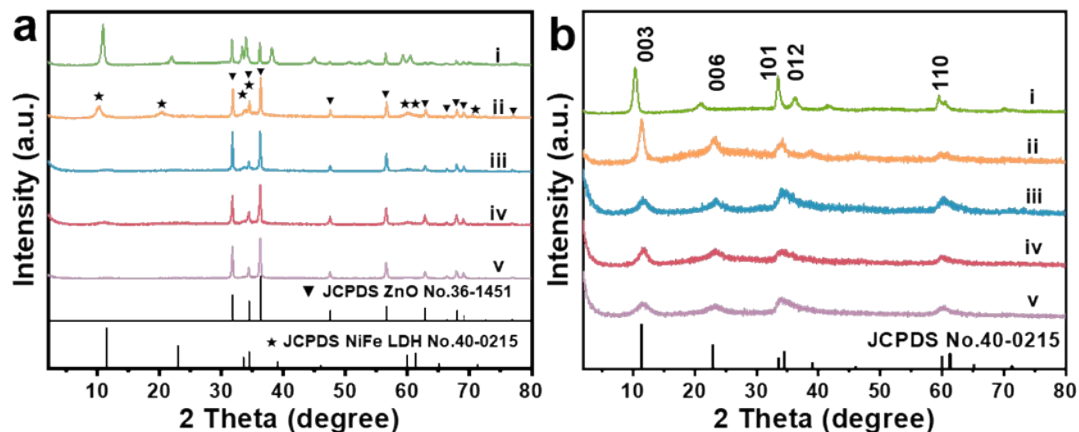

**Fig. S2.** (a) XRD pattern of i)  $\text{Ni}(\text{OH})_2\text{-CST}$ , ii)  $\text{NiFe-82 LDHs-CST}$ , iii)  $\text{NiFeV-611 LDHs-CST}$ , iv)  $\text{NiFeV-811 LDHs-CST}$ , v)  $\text{NiFeV-1011 LDHs-CST}$ ; (b) XRD pattern of i)  $\text{Ni}(\text{OH})_2\text{-HNT}$ , ii)  $\text{NiFe-82 LDHs-HNT}$ , iii)  $\text{NiFeV-611 LDHs-HNT}$ , iv)  $\text{NiFeV-811 LDHs-HNT}$ , v)  $\text{NiFeV-1011 LDHs-HNT}$ .

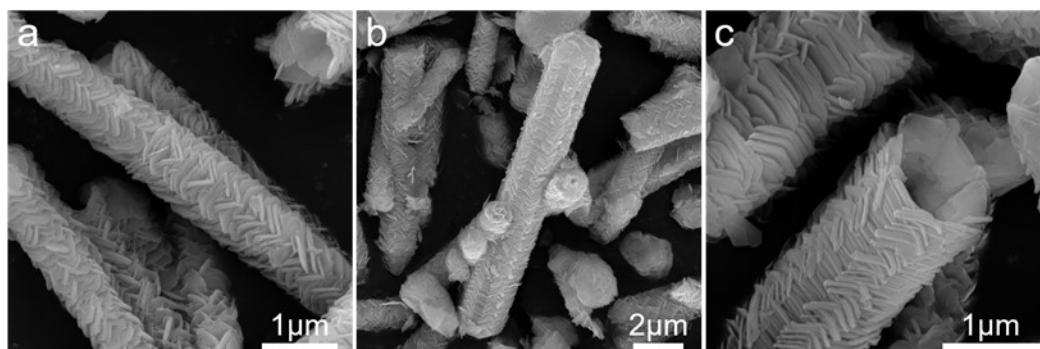

**Fig. S3.** (a) SEM image of  $\text{Ni}(\text{OH})_2\text{-CST}$ ; (b) and (c) SEM image of  $\text{Ni}(\text{OH})_2\text{-HNT}$  with different magnification.

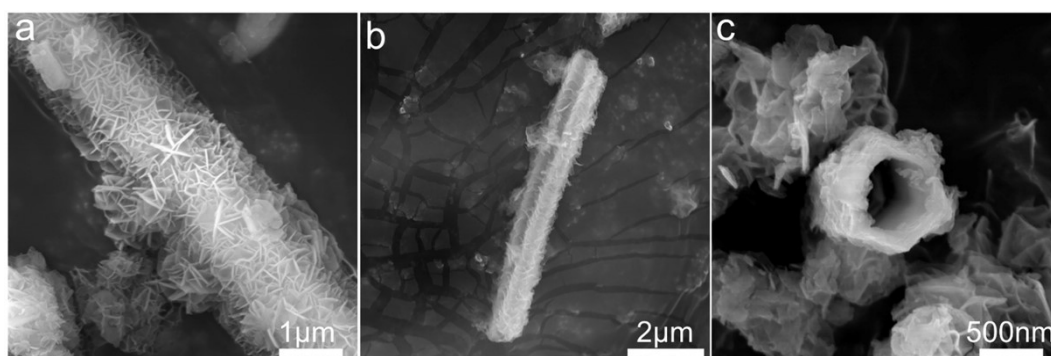

**Fig. S4.** (a) SEM image of  $\text{NiFe-82 LDHs-CST}$ ; (b) and (c) SEM image of  $\text{NiFe-82 LDHs-HNT}$  with different magnification.

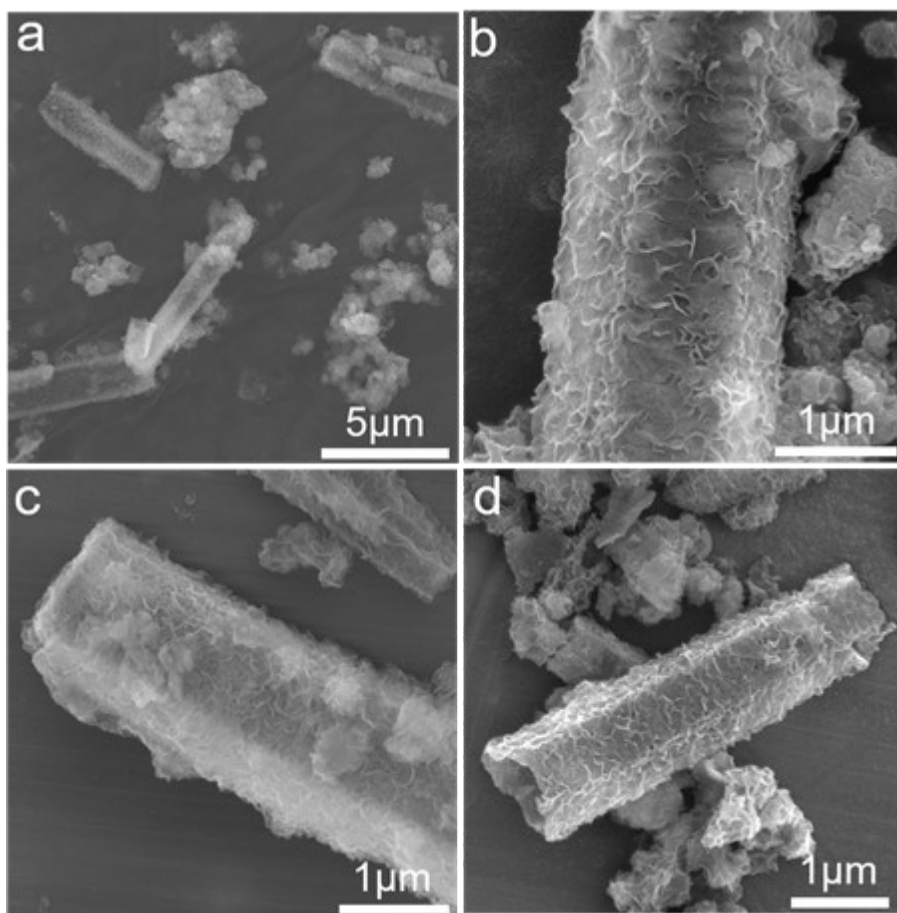

**Fig. S5.** SEM image of (a) NiFeV-811 LDHs-HNT with low magnification; (b) NiFeV-811 LDHs-HNT with high magnification (c) NiFeV-611 LDHs-HNT and (d) SEM image of NiFeV-1011 LDHs-HNT.

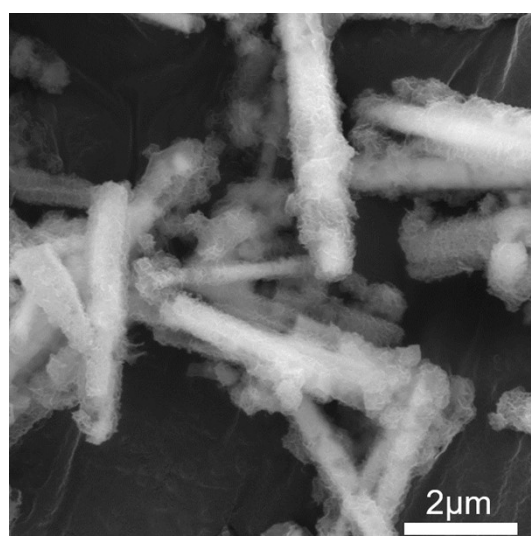

**Fig. S6.** SEM image of NiFeV-811 LDHs-CST.

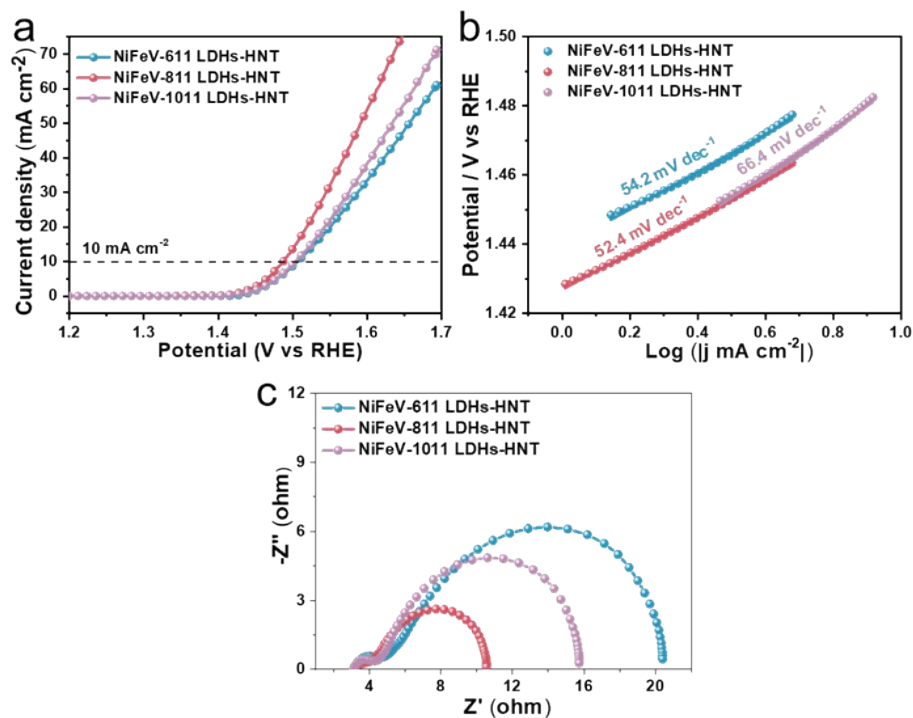

**Fig. S7.** Electrochemical measurement results of NiFe-611 LDHs-HNT, NiFeV-811 LDHs-HNT and NiFeV-1011 LDHs-HNT (a) LSV plots, (b) Tafel plots, (c) Nyquist plots measured at 0.55 V vs Hg/HgO.

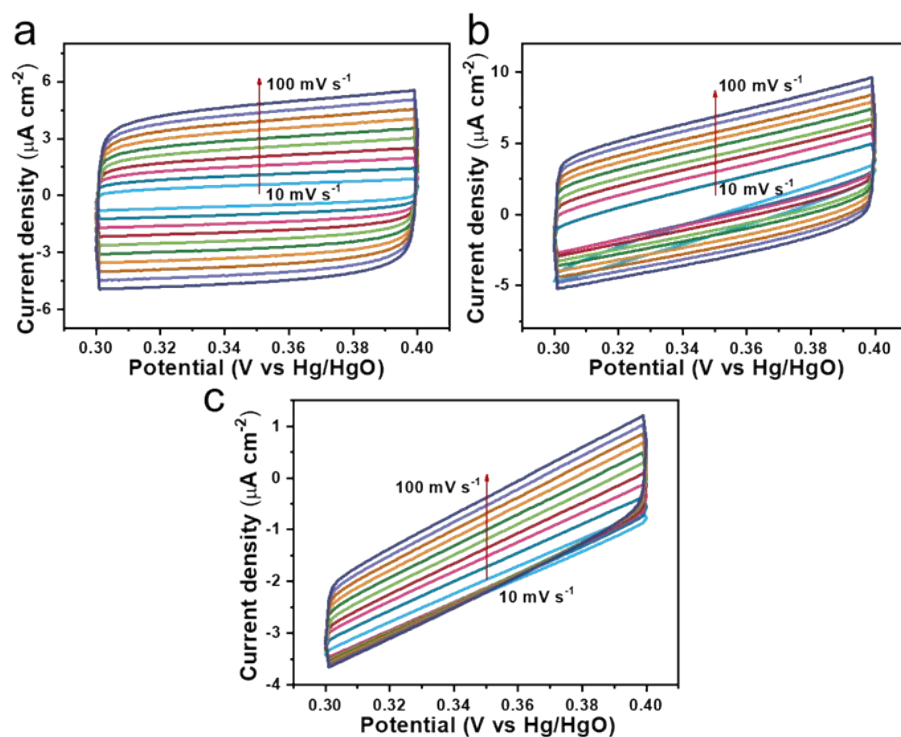

**Fig. S8.** The Cycle voltammograms (CV) curves of (a) NiFe-82 LDHs-HNT, (b) NiFeV-811 LDHs-HNT, (c) NiFeV-811 LDHs-CST.

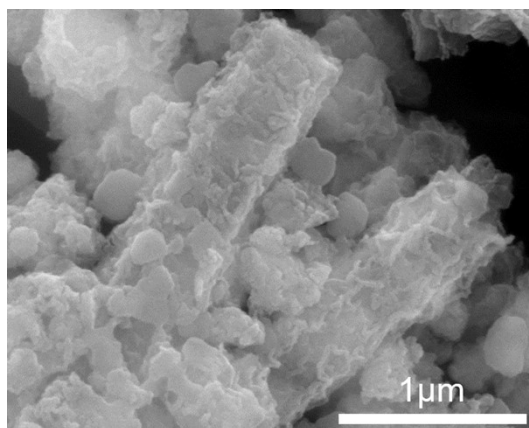

**Fig. S9.** SEM image of NiFeV-811 LDHs-HNT after 45h CP.

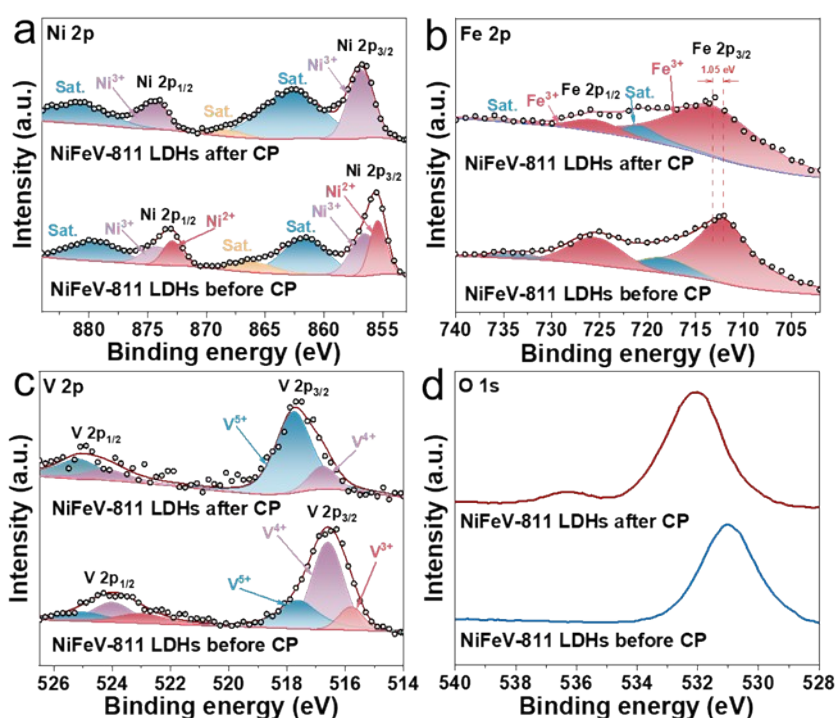

**Fig. S10.** High-resolution XPS spectra of NiFeV-811 LDHs HNT before and after CP measurement: (a) Ni 2p; (b) Fe 2p; (c) V 2p; (d) O 1s spectra. It can be observed that after a long time of OER process, due to the oxidation during the testing, Ni<sup>2+</sup> was completely oxidized to Ni<sup>3+</sup>, while the peaks of Fe 2p also shift to higher binding energy. The content of V<sup>5+</sup> in V 2p shows a higher peak area after OER than the initial NiFeV-811 LDHs-HNT. In the O 1s spectra, the main peak for O 1s is shifted from 530.9 eV to 532.1 eV, which indicate that the hydroxyl group in the hydroxide is converted into peroxide group (-OOH). Meanwhile, compared to the NiFeV-811 LDHs-HNT before CP a new peak is generated at 536.2eV, which is ascribed to the oxidation of carbon fiber paper.



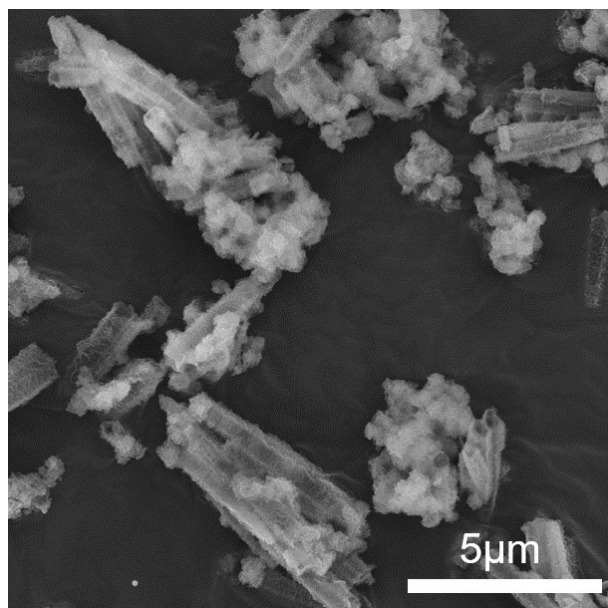

**Fig. S11.** SEM image of NiFeVP hollow nanotubes with low magnification.

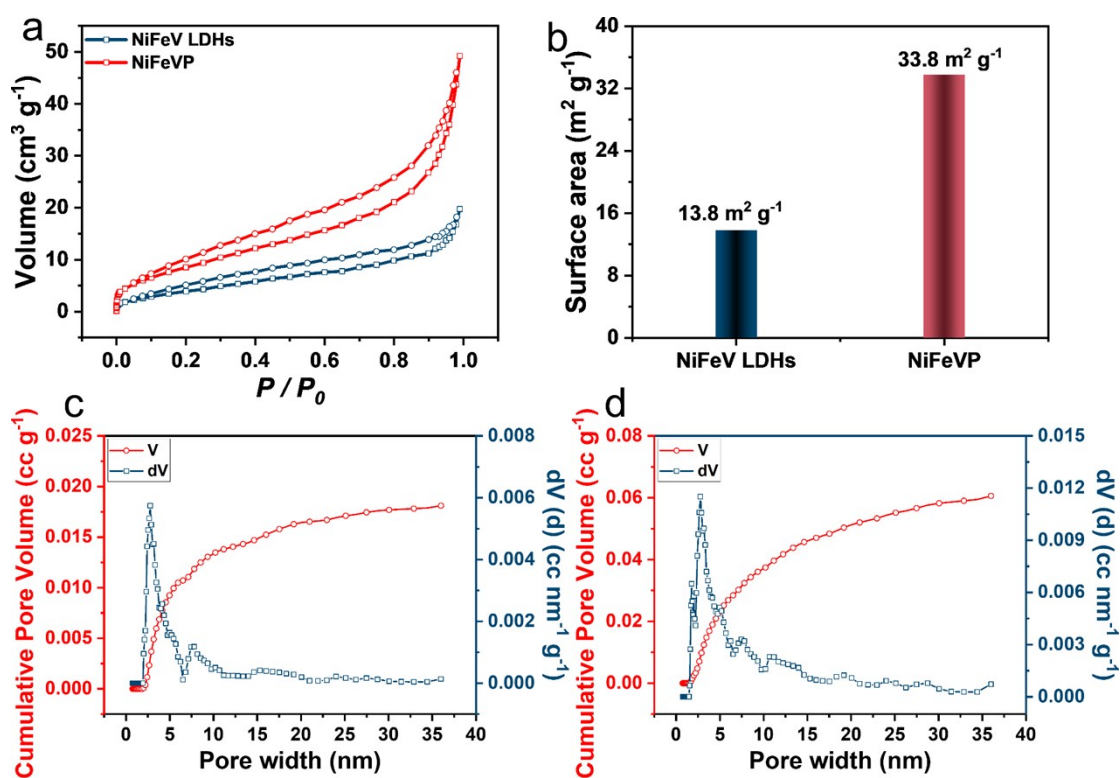

**Fig. S12.** Porosity analysis of NiFeV-811 LDHs HNT and NiFeVP samples. (a) N<sub>2</sub> sorption isotherm and (b) specific surface area. Pore structures of (c) NiFeV-811 LDHs HNT and (d) NiFeVP samples. Pore volume was estimated as 0.024 and 0.061 cc g<sup>-1</sup> for NiFeV-811 LDHs-HNT and NiFeVP hollow nanotubes using DFT analysis, respectively.

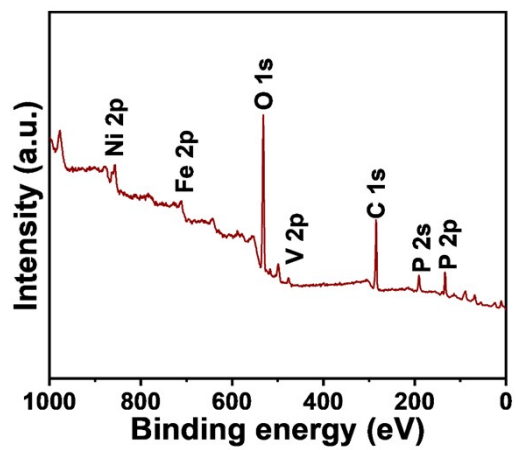

Fig. S13. Full XPS spectrum of NiFeVP hollow nanotubes.

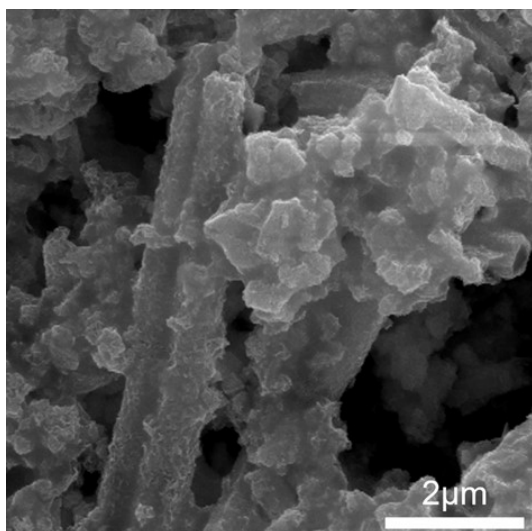

Fig. S14. SEM image of NiFeVP hollow nanotubes after 50h CP.

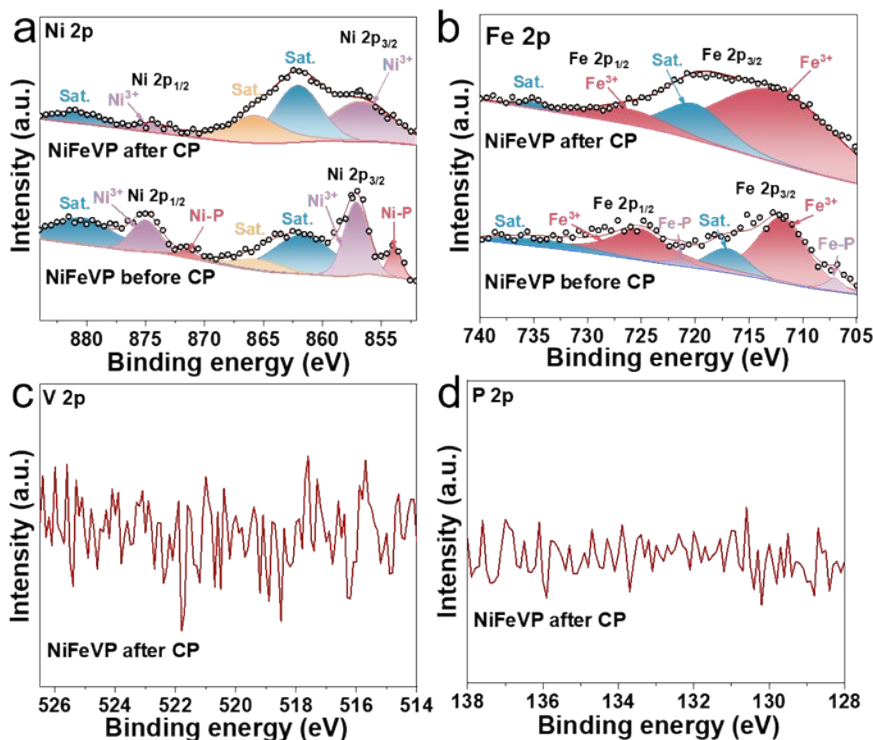

**Fig. S15.** High-resolution XPS spectra of NiFeVP hollow nanotubes before and after CP measurement. (a) Ni 2p, (b) Fe 2p, (c) V 2p and (d) P 2p.

**Table S1.** Calculated values based on the fitted equivalent circuit.

| Product            | Rs ( $\Omega$ ) | Rct ( $\Omega$ ) | Rp ( $\Omega$ ) |
|--------------------|-----------------|------------------|-----------------|
| NiFe-82 LDHs-HNT   | 3.182           | 50.42            | 7.284           |
| NiFeV-811 LDHs-HNT | 3.252           | 6.31             | 1.215           |
| NiFeV-811 LDHs-CST | 2.942           | 51.94            | 16.04           |
| NiFeVP             | 2.696           | 3.649            | 0.915           |

**Table S2.** Electrochemical analysis of NiFeV-811 LDHs-HNT, NiFe-82 LDHs-HNT, NiFeV-811 LDHs-CST and their intrinsic activities toward OER.

| Product            | Double-layer Capacitance ( $C_{dl}$ ) ( $mF\ cm^{-2}$ ) | Rough Factor ( $R_f$ ) | J @ 1.5 V <sub>RHE</sub> ( $mA\ cm^{-2}$ ) | J <sub>specific</sub> @ 1.5 V <sub>RHE</sub> ( $mA\ cm^{-2}$ ) |
|--------------------|---------------------------------------------------------|------------------------|--------------------------------------------|----------------------------------------------------------------|
| NiFeV-811 LDHs HNT | 96.28                                                   | 1.60                   | 13.84                                      | 8.62                                                           |
| NiFe-82 LDHs HNT   | 91.96                                                   | 1.53                   | 6.32                                       | 4.13                                                           |
| NiFeV-811 LDHs CST | 17.66                                                   | 0.30                   | 2.21                                       | 7.52                                                           |



**Table S3.** Comparison of electrocatalytic performances of some representative Ni-based catalysts for OER in 1.0 M KOH.

| Catalysts                             | Current density<br>(mA cm <sup>-2</sup> ) | Tafel slop<br>(mV dec <sup>-1</sup> ) | Overpotential<br>(mV) | Reference |
|---------------------------------------|-------------------------------------------|---------------------------------------|-----------------------|-----------|
| NiFeVP hollow<br>nanotubes            | 10                                        | 30.3                                  | 209.5                 | This work |
| NiFeVP                                | 10                                        | 34.4                                  | 249.0                 | [1]       |
| Ni <sub>1.5</sub> Fe <sub>0.5</sub> P | 10                                        | 125.0                                 | 264.0                 | [2]       |
| D-Ni <sub>5</sub> P <sub>4</sub>  Fe  | 10                                        | 45.7                                  | 217.3                 | [3]       |
| NiFeP                                 | 10                                        | 60.0                                  | 270.0                 | [4]       |
| NiFePi/P                              | 10                                        | 57.0                                  | 230.0                 | [5]       |
| NiFe LDH<br>@NiCoP/NF                 | 10                                        | 48.6                                  | 220.0                 | [6]       |
| V-Ni <sub>2</sub> P/NF-AC             | 10                                        | 66.0                                  | 221.0                 | [7]       |
| P-NiFe-800 NPs                        | 10                                        | 39.0                                  | 270.1                 | [8]       |

## References

1. Y. Jeung, H. Jung, D. Kim, H. Roh, C. Lim, J. W. Han and K. Yong, *J. Mater. Chem. A*, 2021, **9**, 12203-12213.
2. H. Huang, C. Yu, C. Zhao, X. Han, J. Yang, Z. Liu, S. Li, M. Zhang and J. Qiu, *Nano Energy*, 2017, **34**, 472-480.
3. J. Qi, T. Xu, J. Cao, S. Guo, Z. Zhong and J. Feng, *Nanoscale*, 2020, **12**, 6204-6210.
4. Z. Liu, G. Zhang, K. Zhang, H. Liu and J. Qu, *ACS Sustainable Chem. Eng.*, 2018, **6**, 7206-7211.
5. Q. Zhang, T. Li, J. Liang, N. Wang, X. Kong, J. Wang, H. Qian, Y. Zhou, F. Liu, C. Wei, Y. Zhao and X. Zhang, *J. Mater. Chem. A*, 2018, **6**, 7509-7516.
6. H. Zhang, X. Li, A. Hähnel, V. Naumann, C. Lin, S. Azimi, S. L. Schweizer, A. W. Maijenburg and R. B. Wehrspohn, *Adv. Funct. Mater.*, 2018, **28**, 1706847.
7. T. Zhao, X. Shen, Y. Wang, R. K. Hocking, Y. Li, C. Rong, K. Dastafkan, Z. Su and C. Zhao, *Adv. Funct. Mater.*, 2021, **31**, 2100614.
8. W. K. Gao, J. Q. Chi, Z. B. Wang, J. H. Lin, D. P. Liu, J. B. Zeng, J. F. Yu, L. Wang, Y. M. Chai and B. Dong, *J. Colloid Interface Sci.*, 2019, **537**, 11-19.
